# Supplementary material for: High mechanical strength in Zn4B6O13with an unique sodalite-cage structure
Source: Royal Society of Chemistry journal article supplement (doi:10.1039/c6ra25752f), 2017-01-01
Supplement: c6ra25752f1.pdf [file c6ra25752f1.pdf]

**Supporting Information for**  
**High Mechanical Strength in  $Zn_4B_6O_{13}$  with Unique Sodalite-cage**  
**Structure**

Yi Yang<sup>a,e</sup>, Xingxing Jiang<sup>a\*</sup>, Pifu Gong<sup>a,e</sup>, Maxim S. Molokeev<sup>b,f</sup>, Xiaodong Li<sup>c</sup>,  
Yanchun Li<sup>c</sup>, Xiang Wu<sup>d</sup>, Yicheng Wu<sup>a</sup>, Zheshuai Lin<sup>a,e\*</sup>

<sup>a</sup>Center for Crystal Research and Development, Key Laboratory of Functional Crystals and Laser Technology, Technical Institute of Physics and Chemistry, Chinese Academy of Sciences, Beijing 100190, China, email: [zslin@mail.ipc.ac.cn](mailto:zslin@mail.ipc.ac.cn) (*Z.S.,Lin*); [xxjiang@mail.ipc.ac.cn](mailto:xxjiang@mail.ipc.ac.cn) (*X.X. Jiang*)

<sup>b</sup>Laboratory of Crystal Physics, Kirensky Institute of Physics, SBRAS Krasnoyarsk 660036, Russia

<sup>c</sup>Beijing Synchrotron Radiation Facility, Institute of High Energy Physics Chinese Academy of Sciences Beijing 100049, China

<sup>d</sup>State Key Laboratory of Geological Processes and Mineral Resources, China University of Geosciences, Wuhan 430074, China

<sup>e</sup>University of the Chinese Academy of Sciences, Beijing 100049, China

<sup>f</sup>Department of Physics, Far Eastern State Transport University, Khabarovsk 680021, Russia

## Contents

Figure S1 The XRD patterns at ambient condition of ZBO collected by laboratory XRD facility with Cu radiation

Figure S2 The diffractograms of ZBO at various pressure

Figure S3 The high pressure X-ray diffraction patterns of ZBO

Figure S4 Refinement plots for XRD patterns of ZBO

Figure S5 Density of states of ZBO at various pressure

Table S1 Lattice parameters of ZBO at various pressure

Table S2 The B-O bond, Zn-O2 bond and  $\angle$ B-O-B angle at various pressure

Table S3 The bandgap at various pressure

Table S4 The CCDC number of the CIF files under different pressure

Figure S1 The XRD patterns at ambient condition of ZBO collected by laboratory XRD facility with Cu radiation .

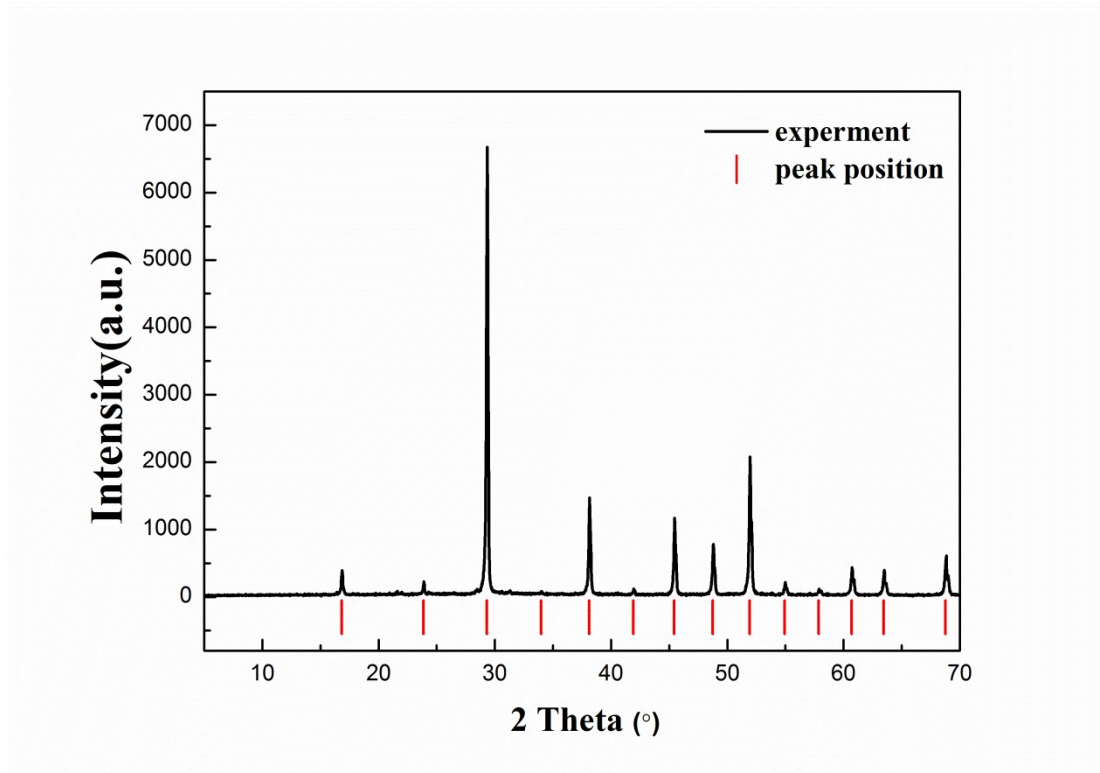

Figure S2 The diffractograms of ZBO at various pressure.

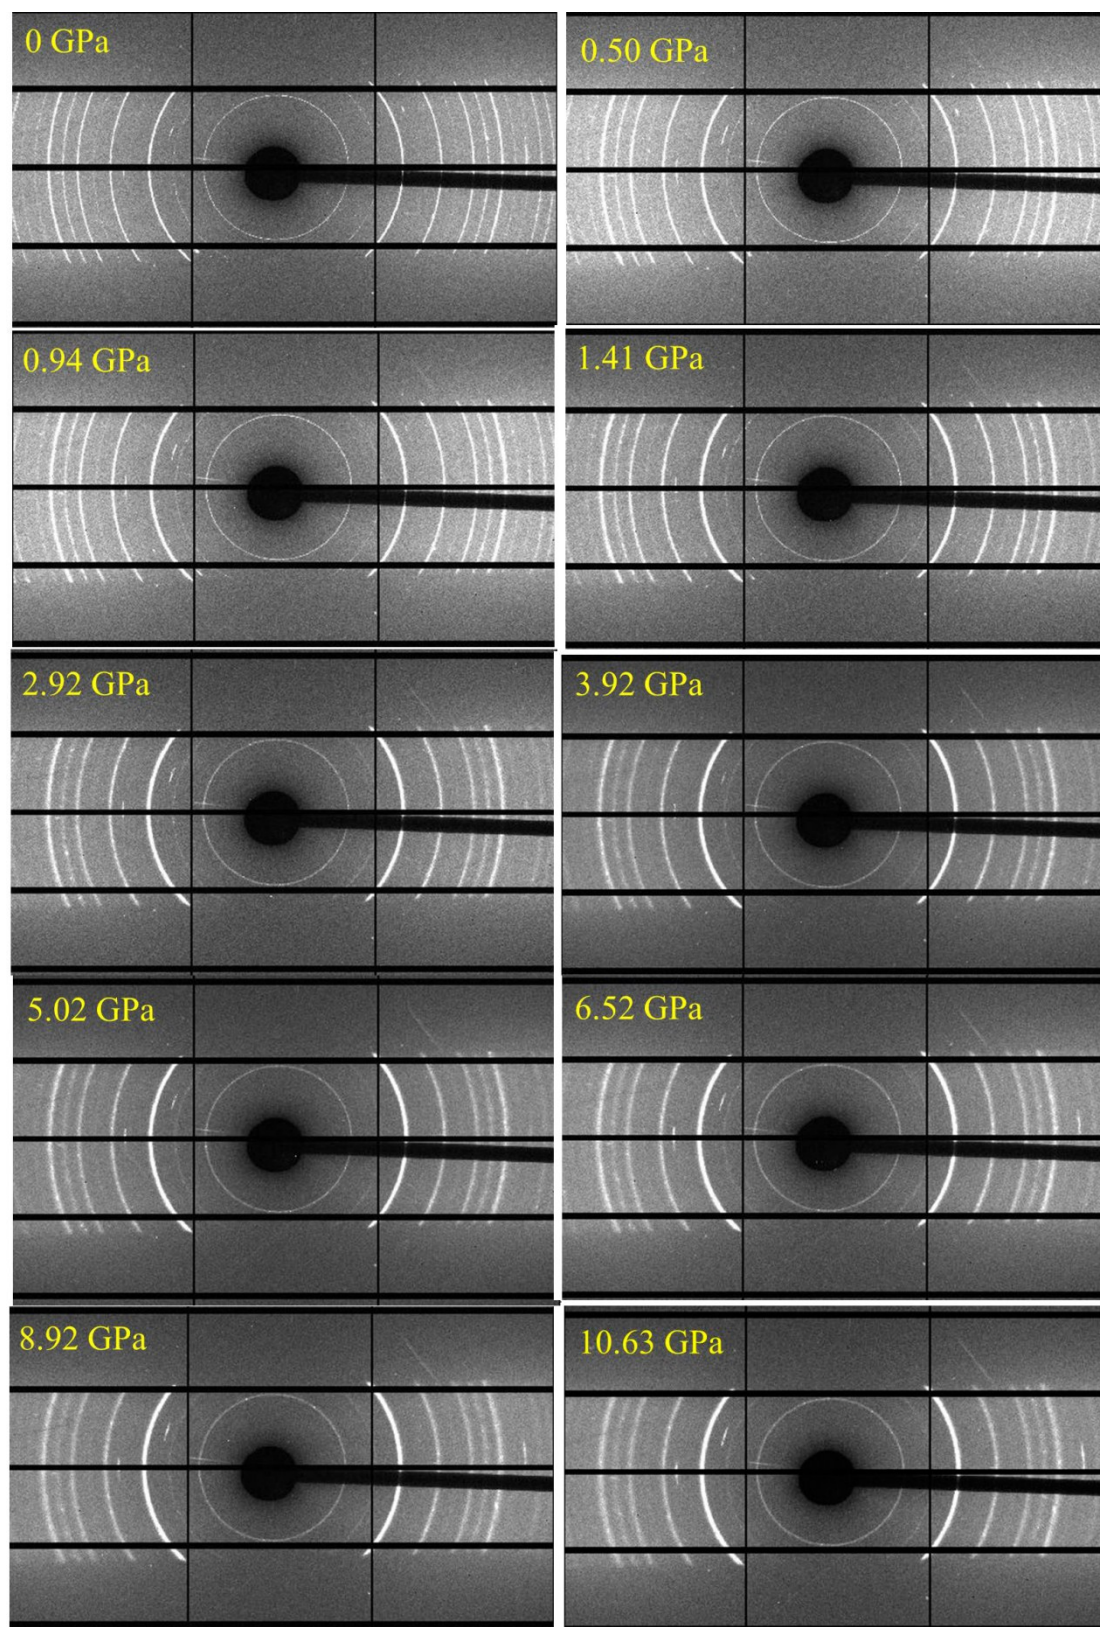

Figure S3 The high pressure X-ray diffraction patterns of ZBO

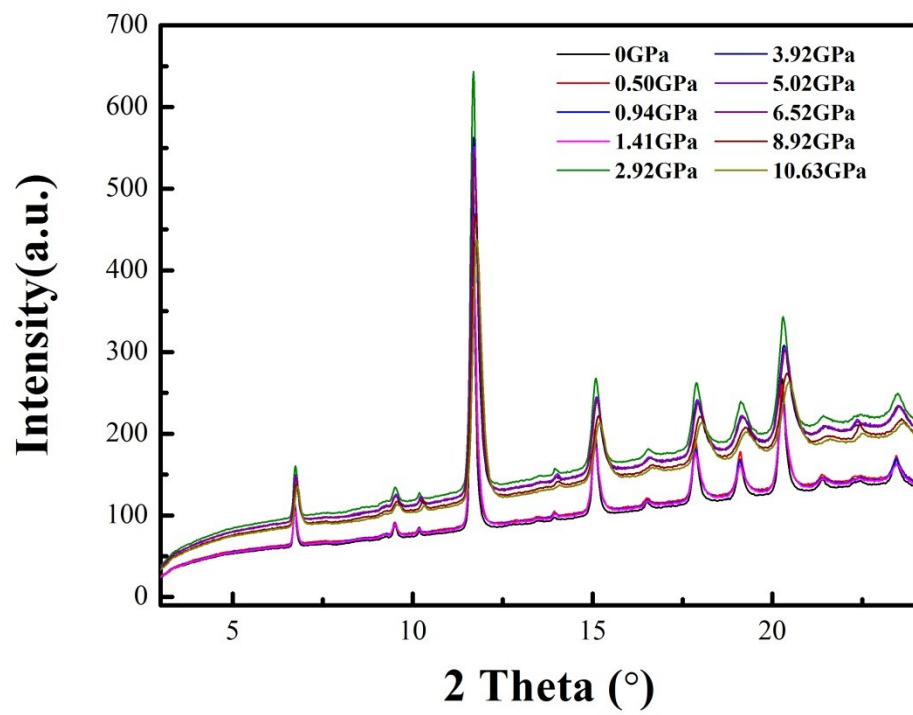

Figure S4 Refinement plots for XRD patterns at (a) 0 GPa and (b) 10.63 GPa of ZBO. The observed ( $\times$ ), calculated (red solid line), and difference profiles (blue solid line) are shown along with the reflection positions (magenta vertical bars)

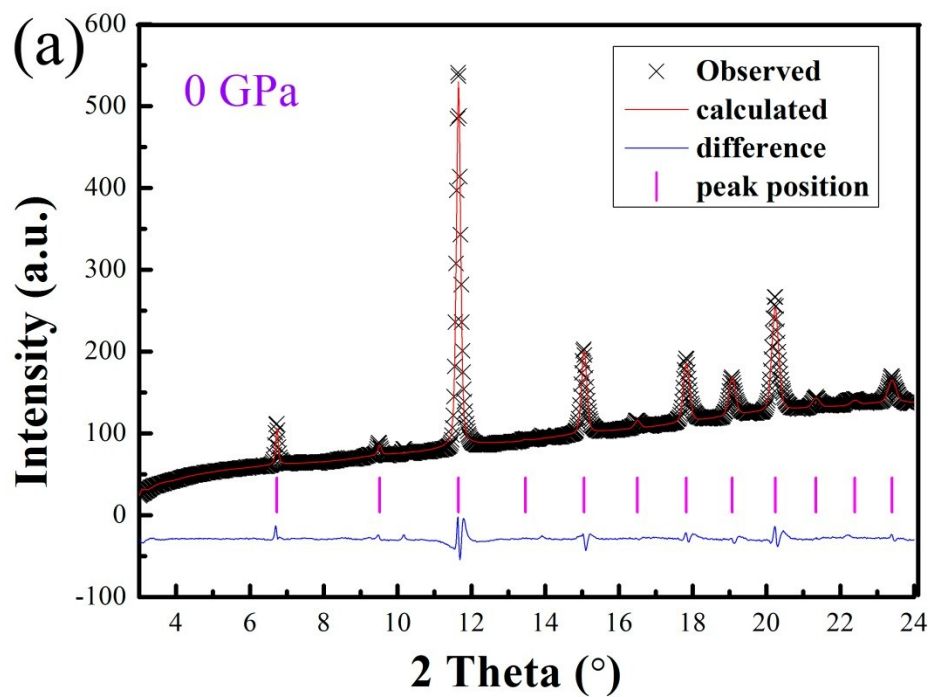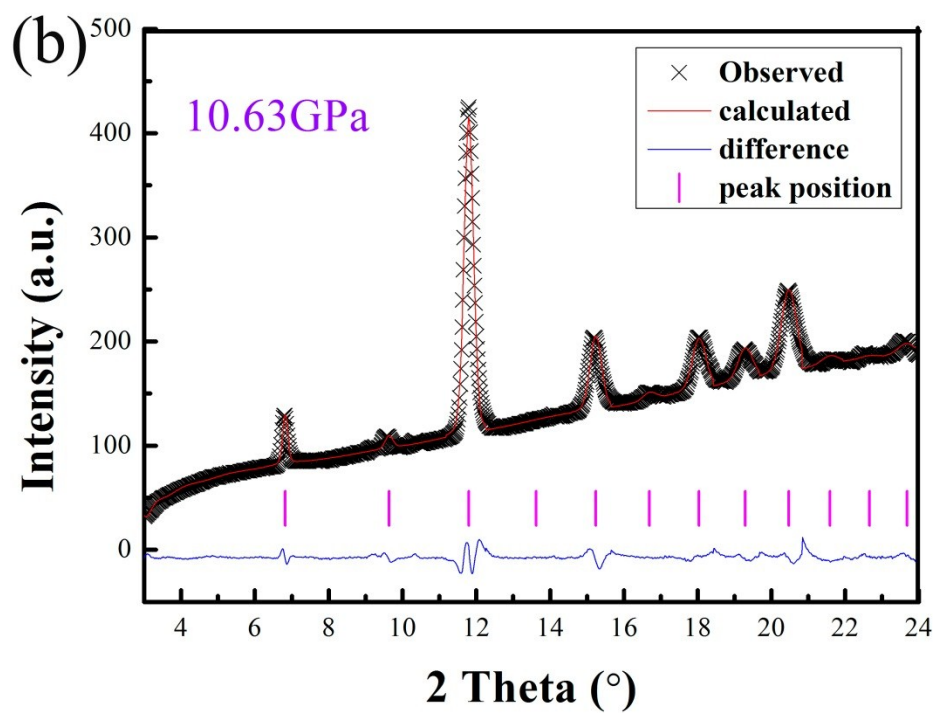

Figure S5 Density of states of ZBO at various pressure. (a) the density of states and partial density of states at 0GPa (b) the density of states of Zn and O atom under 0GPa and 10.63GPa. It is clear that the electronic energy levels near the top of valence band (VB) and the bottom of conduction band (CB) are dominantly composed of the zinc and oxygen orbitals, indicating that the band gap of ZBO is determined mainly by the electron transition within the Zn–O bonds. As pressure increase from 0 to 10.63GPa, the contraction of Zn-O bonds reinforces the hybridization between zinc and oxygen atoms, which lower the energy of the electron states at the top of VB. Thus it requires crossing wider energy range for electrons to transit from VB to CB, so the band gap is broadened.

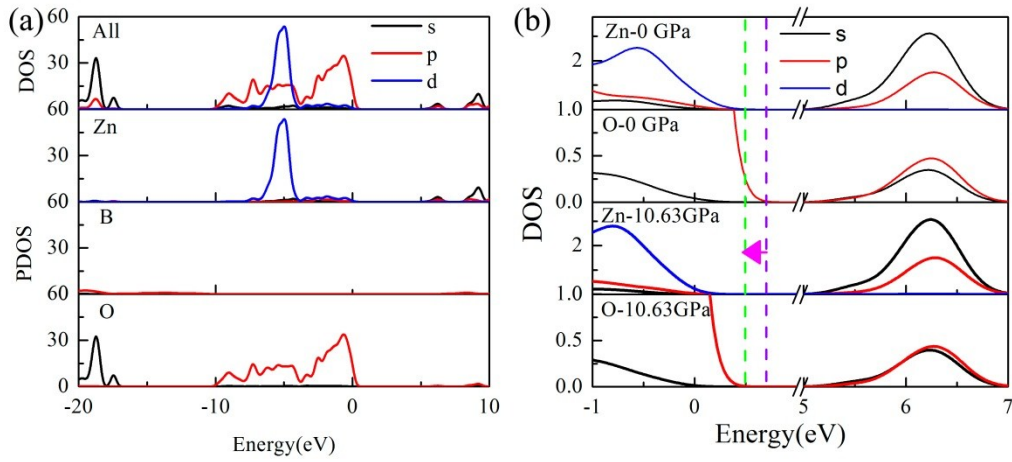

Table S1 Lattice parameters of ZBO at various pressure

| <b>Pressure(GPa)</b> | <b>Lattice parameter(Å)</b> |
|----------------------|-----------------------------|
| <b>0</b>             | 7.4957(7)                   |
| <b>0.50</b>          | 7.4741(9)                   |
| <b>0.94</b>          | 7.4690(1)                   |
| <b>1.41</b>          | 7.4584(3)                   |
| <b>2.92</b>          | 7.4414(3)                   |
| <b>3.92</b>          | 7.4354(3)                   |
| <b>5.02</b>          | 7.4180(3)                   |
| <b>6.52</b>          | 7.4161(3)                   |
| <b>8.92</b>          | 7.4024(4)                   |
| <b>10.63</b>         | 7.3881(4)                   |



Table S2 The B-O bond, Zn-O2 bond and  $\angle$ B-O-B angle at various pressure

| <b>Pressure (GPa)</b> | <b>B-O bond(Å)</b> | <b>Relative value</b> | <b>Zn-O2 bond(Å)</b> | <b>Relative value</b> | <b><math>\angle</math>B-O-B(°)</b> | <b>Relative value</b> |
|-----------------------|--------------------|-----------------------|----------------------|-----------------------|------------------------------------|-----------------------|
| <b>0</b>              | 1.472              | 1.000                 | 1.979                | 1.000                 | 128.301                            | 1.000                 |
| <b>0.50</b>           | 1.470              | 0.999                 | 1.972                | 0.996                 | 128.068                            | 0.998                 |
| <b>0.94</b>           | 1.469              | 0.998                 | 1.971                | 0.996                 | 128.048                            | 0.998                 |
| <b>1.41</b>           | 1.468              | 0.997                 | 1.968                | 0.994                 | 127.843                            | 0.996                 |
| <b>2.92</b>           | 1.465              | 0.995                 | 1.963                | 0.992                 | 127.745                            | 0.996                 |
| <b>3.92</b>           | 1.464              | 0.994                 | 1.961                | 0.991                 | 127.718                            | 0.995                 |
| <b>5.02</b>           | 1.462              | 0.993                 | 1.956                | 0.988                 | 127.587                            | 0.994                 |
| <b>6.52</b>           | 1.461              | 0.993                 | 1.956                | 0.988                 | 127.560                            | 0.994                 |
| <b>8.92</b>           | 1.459              | 0.991                 | 1.952                | 0.986                 | 127.447                            | 0.993                 |
| <b>10.63</b>          | 1.457              | 0.990                 | 1.948                | 0.984                 | 127.346                            | 0.993                 |

Table S3 The bandgap at various pressure

| Pressure(GPa) | Eg (eV) | UV absorption edge(nm) |
|---------------|---------|------------------------|
| <b>0</b>      | 5.341   | 232.2                  |
| <b>0.50</b>   | 5.401   | 229.6                  |
| <b>0.94</b>   | 5.407   | 229.3                  |
| <b>1.41</b>   | 5.426   | 228.5                  |
| <b>2.92</b>   | 5.463   | 227.0                  |
| <b>3.92</b>   | 5.475   | 226.5                  |
| <b>5.02</b>   | 5.512   | 225.0                  |
| <b>6.52</b>   | 5.513   | 224.9                  |
| <b>8.92</b>   | 5.538   | 223.9                  |
| <b>10.63</b>  | 5.566   | 222.8                  |

Table S4 The CCDC number of the CIF files under different pressure

| CIF files                                              | CCDC    |
|--------------------------------------------------------|---------|
| <b>Zn<sub>4</sub>B<sub>6</sub>O<sub>13</sub>_0</b>     | 1519591 |
| <b>Zn<sub>4</sub>B<sub>6</sub>O<sub>13</sub>_0.50</b>  | 1519593 |
| <b>Zn<sub>4</sub>B<sub>6</sub>O<sub>13</sub>_0.94</b>  | 1519594 |
| <b>Zn<sub>4</sub>B<sub>6</sub>O<sub>13</sub>_1.41</b>  | 1519595 |
| <b>Zn<sub>4</sub>B<sub>6</sub>O<sub>13</sub>_2.92</b>  | 1519596 |
| <b>Zn<sub>4</sub>B<sub>6</sub>O<sub>13</sub>_3.92</b>  | 1519597 |
| <b>Zn<sub>4</sub>B<sub>6</sub>O<sub>13</sub>_5.02</b>  | 1519598 |
| <b>Zn<sub>4</sub>B<sub>6</sub>O<sub>13</sub>_6.52</b>  | 1519599 |
| <b>Zn<sub>4</sub>B<sub>6</sub>O<sub>13</sub>_8.92</b>  | 1519600 |
| <b>Zn<sub>4</sub>B<sub>6</sub>O<sub>13</sub>_10.63</b> | 1519592 |
